# Supplementary material
Source: MDPI journal article supplement (https://www.mdpi.com/2414-4088/4/3/53)
Supplement: s1 [file s1]

**S1: Vignettes**

|                |                 | <b>Locus</b>                                                                                                                                                                                                                                                                                                                                                                                                                                                           |                                                                                                                                                                                                                                                                                                                                                                                                                                                    |
|----------------|-----------------|------------------------------------------------------------------------------------------------------------------------------------------------------------------------------------------------------------------------------------------------------------------------------------------------------------------------------------------------------------------------------------------------------------------------------------------------------------------------|----------------------------------------------------------------------------------------------------------------------------------------------------------------------------------------------------------------------------------------------------------------------------------------------------------------------------------------------------------------------------------------------------------------------------------------------------|
|                |                 | <b>Self</b>                                                                                                                                                                                                                                                                                                                                                                                                                                                            | <b>Other</b>                                                                                                                                                                                                                                                                                                                                                                                                                                       |
| <b>Valence</b> | <b>Negative</b> | <p>Think for a minute about a topic, issue, or incident that would undermine how the other person thinks about you. For example, it could be a discussion about</p> <ul style="list-style-type: none"> <li>- you failing to meet his or her expectations,</li> <li>- you doing something morally distasteful,</li> <li>- you holding an opinion you know the other person would find repugnant,</li> <li>- you being disloyal toward the other person, etc.</li> </ul> | <p>Think for a minute about a topic, issue, or incident that would undermine how you think about the other person. For example, it could be your knowledge about</p> <ul style="list-style-type: none"> <li>- his or her failure to meet your expectations,</li> <li>- him or her doing something morally distasteful,</li> <li>- him or her being disloyal toward you,</li> <li>- you revealing your unhappiness with him or her, etc.</li> </ul> |
|                | <b>Positive</b> | <p>Think for a minute about a topic, issue, or incident that would enhance how the other person thinks about you. For example, it could be</p> <ul style="list-style-type: none"> <li>- a significant achievement by you,</li> <li>- you revealing highly positive feelings toward the other person,</li> <li>- you proposing something you know the other person would love, etc.</li> </ul>                                                                          | <p>Think for a minute about a topic, issue, or incident that would enhance how you think about the other person. For example, it could be</p> <ul style="list-style-type: none"> <li>- news of his or her significant achievement,</li> <li>- his or her admirable behavior in a difficult situation,</li> <li>- a demonstration of his or her loyalty toward you, etc.</li> </ul>                                                                 |

## S2: Coding Scheme

| #            | Main Category              | Subcategory I      | Subcategory II   | Definition                                                           | Examples                                                                   |
|--------------|----------------------------|--------------------|------------------|----------------------------------------------------------------------|----------------------------------------------------------------------------|
|              | <i>Reasons</i>             | <i>Focus</i>       | <i>Process</i>   | <i>Answers containing ...</i>                                        |                                                                            |
| <b>1.0</b>   | <b>Interaction Control</b> |                    |                  | ... time-based reasoning                                             | "immediacy", "interactivity",<br>"delayed", "direct", "time to"            |
| <b>1.1</b>   |                            | <b>Self</b>        |                  | ... time-based, self-oriented reasoning                              | "gives me time"                                                            |
| <b>1.1.1</b> |                            |                    | <b>Sending</b>   | ... time-based, self-oriented reasoning about the sending process    | "gives me the opportunity to formulate<br>a message"                       |
| <b>1.1.2</b> |                            |                    | <b>Receiving</b> | ... time-based, self-oriented reasoning about the receiving process  | "I can ignore a response"                                                  |
| <b>1.2</b>   |                            | <b>Other</b>       |                  | ... time-based, other-oriented reasoning                             | "directly react to the other person"                                       |
| <b>1.2.1</b> |                            |                    | <b>Sending</b>   | ... time-based, other-oriented reasoning about the sending process   | "other has to answer me"                                                   |
| <b>1.2.2</b> |                            |                    | <b>Receiving</b> | ... time-based, other-oriented reasoning about the receiving process | "other person has to face the problem"                                     |
| <b>2.0</b>   | <b>Emotion Control</b>     |                    |                  | ... cue-based reasoning                                              | "mimics", "authentic", "not see each<br>other", "emotion", "joy", "sorrow" |
| <b>2.1</b>   |                            | <b>Self</b>        |                  | ... cue-based, self-oriented reasoning                               | "it feels unpleasant"                                                      |
| <b>2.1.1</b> |                            |                    | <b>Sending</b>   | ... cue-based, self-oriented reasoning about the sending process     | "best way to express myself"                                               |
| <b>2.1.2</b> |                            |                    | <b>Receiving</b> | ... cue-based, self-oriented reasoning about the receiving process   | "better to detect other's emotions and<br>feelings"                        |
| <b>2.2</b>   |                            | <b>Other</b>       |                  | ... cue-based, other-oriented reasoning                              | "other might dislike eye-contact"                                          |
| <b>2.2.1</b> |                            |                    | <b>Sending</b>   | ... cue-based, other-oriented reasoning about the sending process    | "lets other person convey his or her<br>emotion"                           |
| <b>2.2.2</b> |                            |                    | <b>Receiving</b> | ... cue-based, other-oriented reasoning about the receiving process  | "other person receives more clearly"                                       |
| <b>3.0</b>   | <b>Pragmatic Reasons</b>   |                    |                  | ... pragmatic reasoning                                              |                                                                            |
| <b>3.1</b>   |                            | <b>Convenience</b> |                  | ... reasoning about the ease of use, accessibility and practicality  | "it is simple"                                                             |
| <b>3.2</b>   |                            | <b>Habit</b>       |                  | ... reasoning about established patterns of behavior                 | "the only way I communicate"                                               |
| <b>4.0</b>   | <b>Symbolic Reasons</b>    |                    |                  | ... reasoning about social norms and interpretation of choice        | "right thing to do", "appropriate",<br>"shows appreciation"                |
